# Supplementary material for: Detection and evolution of SARS-CoV-2 coronavirus variants of concern with mass spectrometry
Source: Springer Nature journal article supplement (doi:10.1007/s00216-021-03649-1), 2021-09-16
Supplement: 216_2021_3649_MOESM2_ESM.pdf [file 216_2021_3649_MOESM2_ESM.pdf]

sequence tree

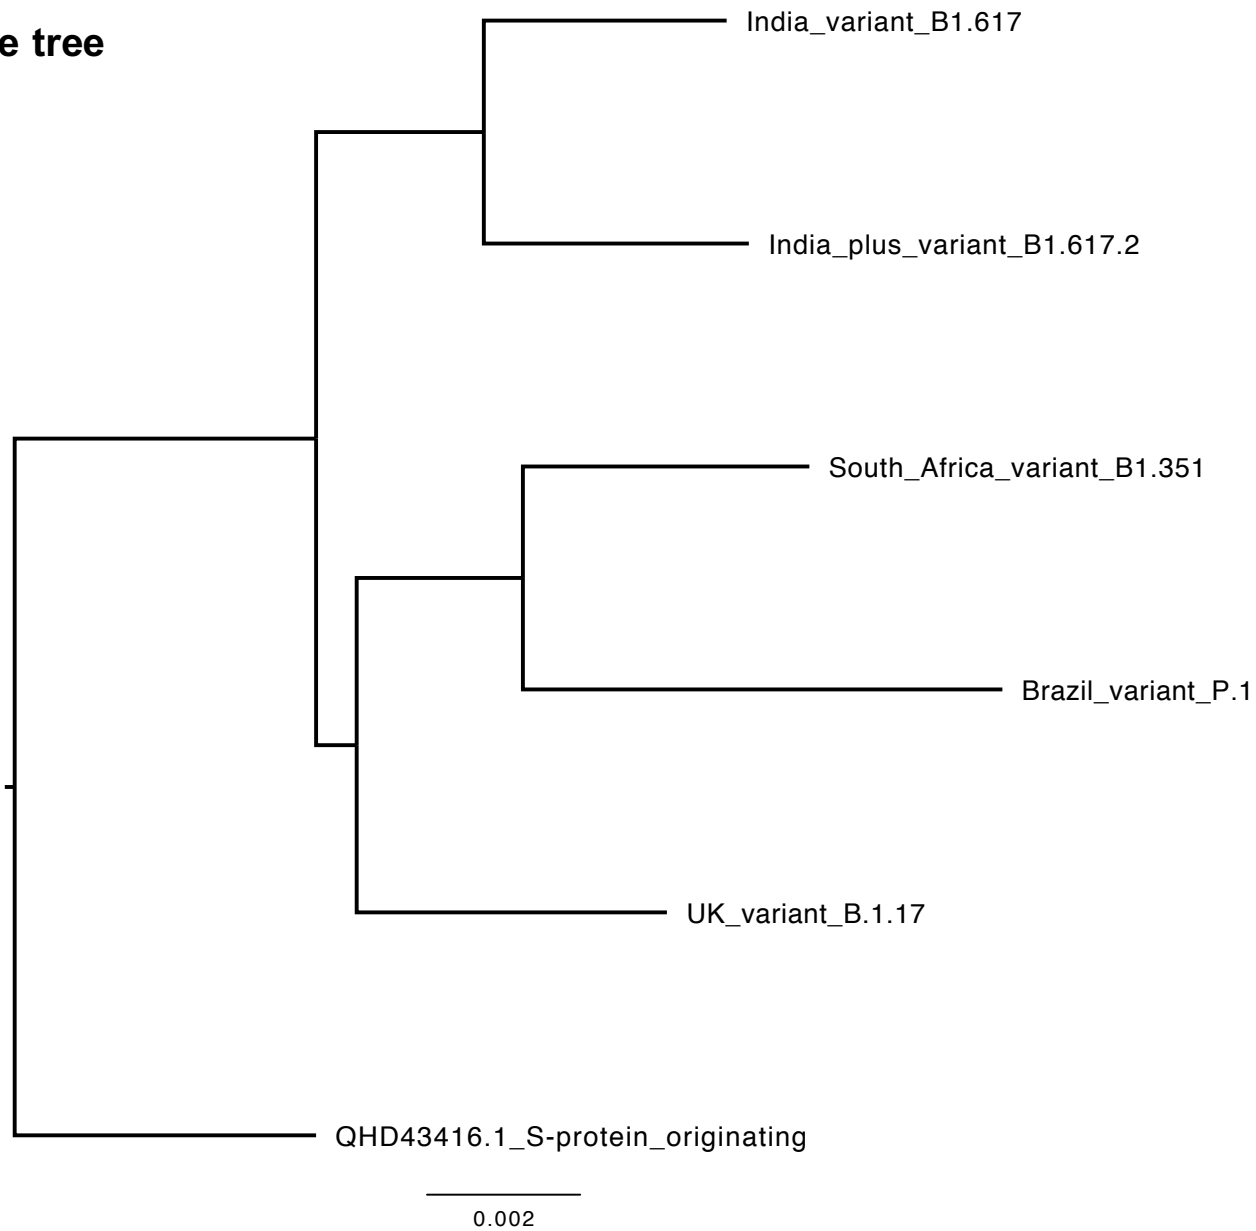

**Fig. S1** Sequence tree for the S-protein of an originating strain and five major variants of concern constructed following an alignment of sequences across a common span of residues 16 to 1213
